# Supplementary material
Source: PubMed Central journal article supplement (PMC11072809)
Supplement: 18_2023_4948_MOESM1_ESM.pdf [file 18_2023_4948_MOESM1_ESM.pdf]

## Supplementary information

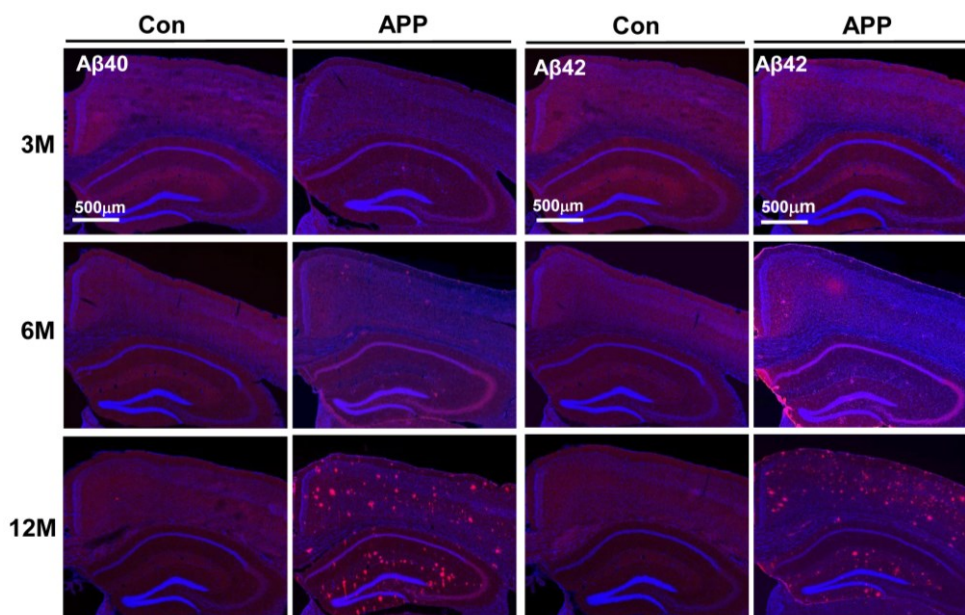

**Fig.S1 Representative micrographs show A $\beta$  deposition in the brain of APP/PS1 mice**

Brain sections from APP/PS1 mice and the littermate controls (3-month, 6-month, 12-month) were immunostained with antibodies to A $\beta$ 42 (Biolegend:805501) and A $\beta$ 40 (Biolegend:805409). N=5/group. Sporadic A $\beta$  deposition were observed in AD brain at 6 months, extensive A $\beta$  deposition were found in the brain of 12-month-old APP/PS1 mice.

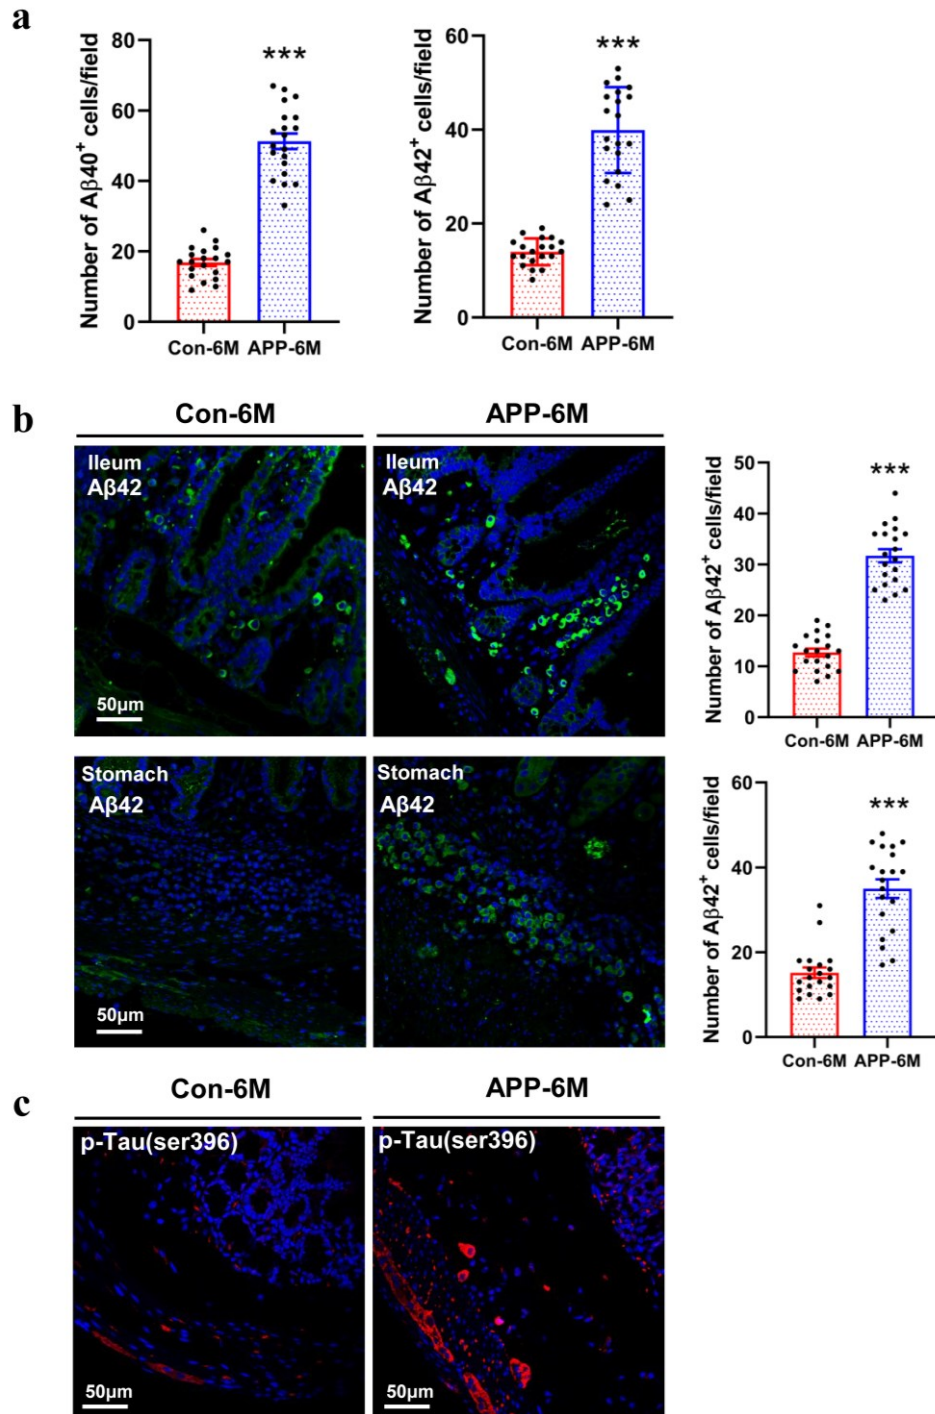

**Fig.S2 A $\beta$  deposition in the GI tract of APP/PS1 mice**

(a) Quantitative analysis of the number of A $\beta$ 40<sup>+</sup> and A $\beta$ 42<sup>+</sup> cells in the colon of 6-month-old APP/PS1 mice and their littermate controls. Four fields per preparation, N=5/group. Data are presented as mean  $\pm$  SEM, unpaired *t* test, \*\*\**P*<0.001. (b) Representative micrographs and quantitative analysis of A $\beta$ 42<sup>+</sup> in the ileum and stomach of 6-month-old APP/PS1 mice and the littermate controls. The Anti-A $\beta$ 42

antibody (Biolegend:805501) was used. Four fields per preparation, N=5/group. Data are presented as mean  $\pm$  SEM, unpaired *t* test, \*\*\**P*<0.001. (c) Representative micrographs of phosphorylated tau (p-Tau) immunoreactivity in the colonic myenteric plexus of 6-month-old APP/PS1 mice and the littermate controls. N=5/group.

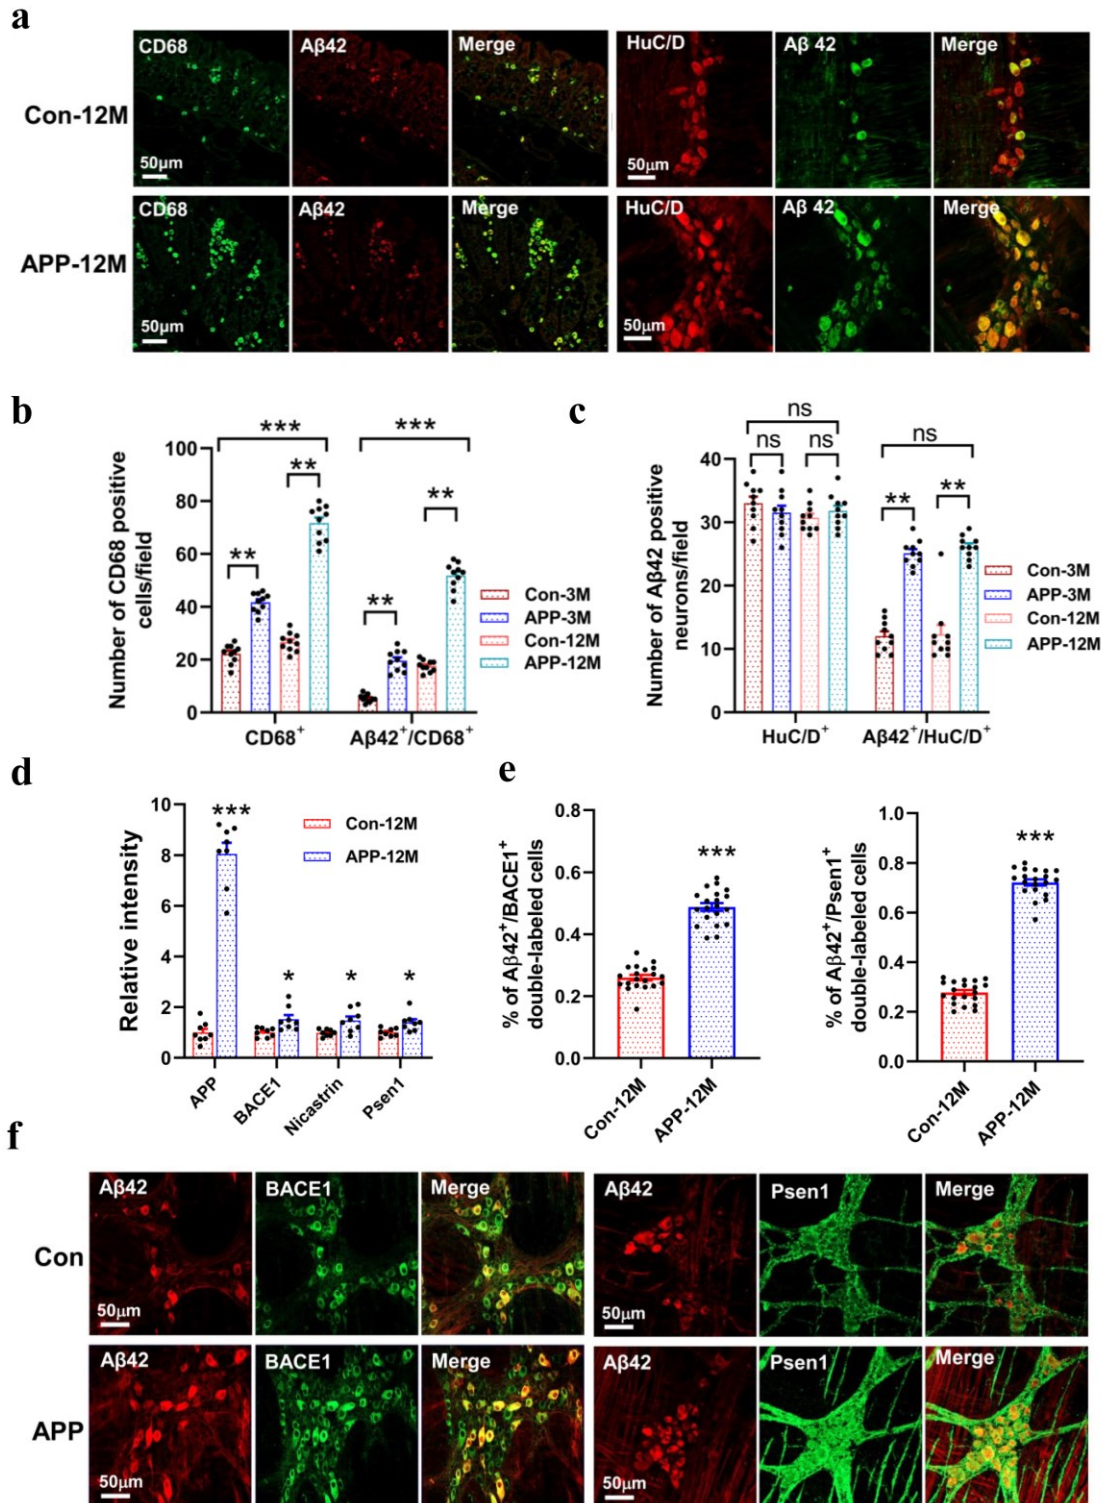

**Fig.S3 Analysis of co-localization of A $\beta$ 42-positive cells in the colonic mucosal layer and myenteric plexus of APP/PS1 mice**

(a) Immunofluorescence characterization of the A $\beta$ 42<sup>+</sup> cells from the colonic sections and plexus myenteric plexus strips in 12-month-old APP/PS1 mice and littermate controls. The Anti-A $\beta$ 42 antibody (Abcam: ab10148) was used. N=5/group. (b) Quantitative analysis of the CD68<sup>+</sup> cells and A $\beta$ 42<sup>+</sup>/CD68<sup>+</sup> double-labeled cells from the colonic sections and plexus myenteric plexus strips. Two fields per preparation, N=5/group. Data are presented as mean  $\pm$  SEM. A two-way ANOVA analysis revealed a significant effect of age on the number of CD68<sup>+</sup> cells (F (1, 18) = 214.5,  $P$ <0.001) and the number of A $\beta$ 42<sup>+</sup>/CD68<sup>+</sup> cells (F (1, 18) = 1038,  $P$ <0.001), \*\* $P$ <0.01, \*\*\* $P$ <0.001. (c) Quantitative analysis of the HuC/D<sup>+</sup> cells and A $\beta$ 42<sup>+</sup>/HuC/D<sup>+</sup> double-labeled cells from the colonic sections and plexus myenteric plexus strips. Two fields per preparation, N=5/group. Data are presented as mean  $\pm$  SEM. A two-way ANOVA analysis revealed no significant effect of age on the number of HuC/D<sup>+</sup> cells (F (1, 18) = 1.090,  $P$ =0.3102) and the number of A $\beta$ 42<sup>+</sup>/HuC/D<sup>+</sup> cells (F (1, 18) = 0.5243,  $P$ =0.4783), \*\* $P$ <0.01, \*\*\* $P$ <0.001. The “ns” represents no significance. (d) Quantitative analysis of the expression of proteins for A $\beta$  generation in the colon of 12-month-old APP/PS1 mice and littermate controls. N=8/group. Data are presented as mean  $\pm$  SEM, unpaired  $t$  test, \* $P$ <0.05, \*\*\* $P$ <0.001. (e) Quantitative analysis of the proportion of cells with A $\beta$ 42 deposition in BACE1<sup>+</sup> cells and Psen1<sup>+</sup> cells from the colonic myenteric plexus. Four fields per preparation, N=5/group. Data are presented as mean  $\pm$  SEM, unpaired  $t$  test, \*\*\* $P$ <0.001. (f) Representative micrographs show the intracellular A $\beta$ 42 deposition in BACE1<sup>+</sup> and Psen1<sup>+</sup> cells from the colonic myenteric plexus of APP/PS1 mice and the control group. The Anti-A $\beta$ 42 antibody (Biolegend:805501) was used. N=5/group.

## KCl

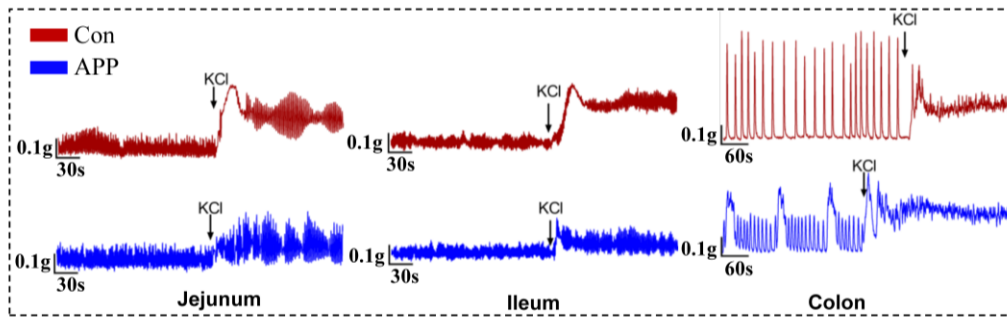

**Fig.S4 The KCl-induced contraction of intestinal smooth muscle was impaired in the APP/PS1 mice**

Representative tracing of KCl-induced muscle contraction in jejunal segments, ileal segments, and colonic segments from 3-month-old APP/PS1 and littermate controls. Changes in muscle tension 5-10 min before and after exposure to the drug were measured, 15 mmol/L of KCl.

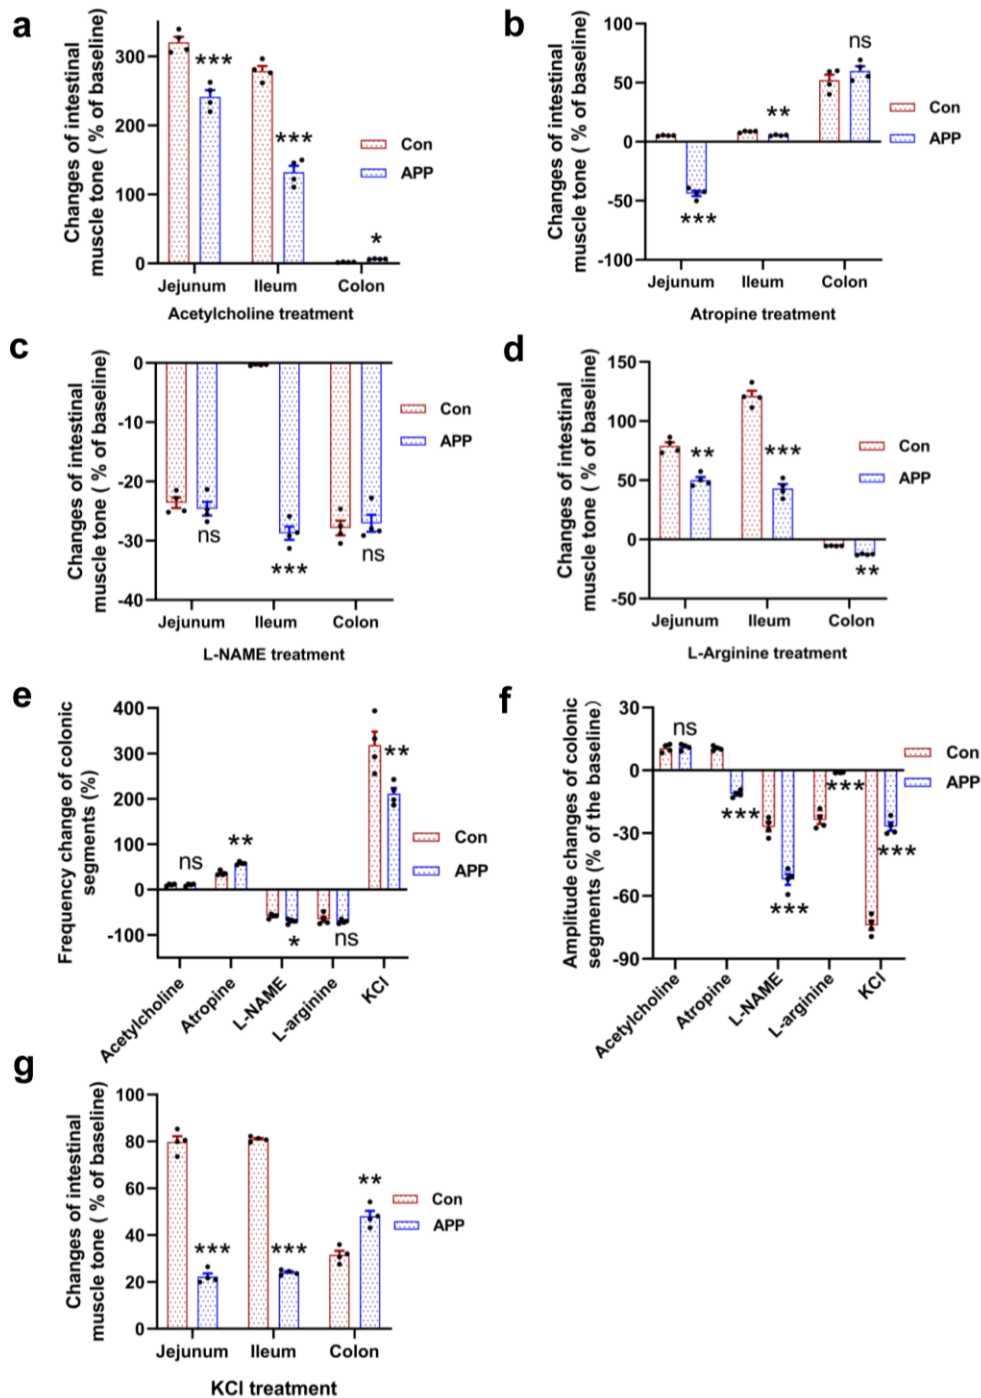

**Fig.S5 Impaired contraction and relaxation in intestinal muscle strips of APP/PS1 mice**

(a-d) Quantitative analysis of changes in intestinal muscle tone induced by (A) acetylcholine, (b) atropine, (c) L-NAME, (d) L-arginine in the 3-month-old APP/PS1 and littermate controls. (e-f) Quantitative analysis of frequency changes (e) and amplitude changes (f) in colonic segments induced by acetylcholine, atropine, L-NAME, L-arginine, and KCl. (g) Quantitative analysis of changes in intestinal

muscle tone induced by KCl. Changes in muscle tension 5-10 min before and after exposure to each drug were measured. Data are presented as mean  $\pm$  SEM, \* $P$ <0.05, \*\* $P$ <0.01, \*\*\* $P$ <0.001. The “ns” represents no significance. Drugs used in this study: 1  $\mu$ mol/L of Acetylcholine; 50  $\mu$ mol/L of Atropine; 10 mmol/L of L-NAME for jejunum and ileum; 2 mmol/L of L-NAME for colon; 15 mmol/L of L-arginine and KCl; 20  $\mu$ mol/L of A $\beta$ 42 and A $\beta$ 40. All drug were prepared before being used.

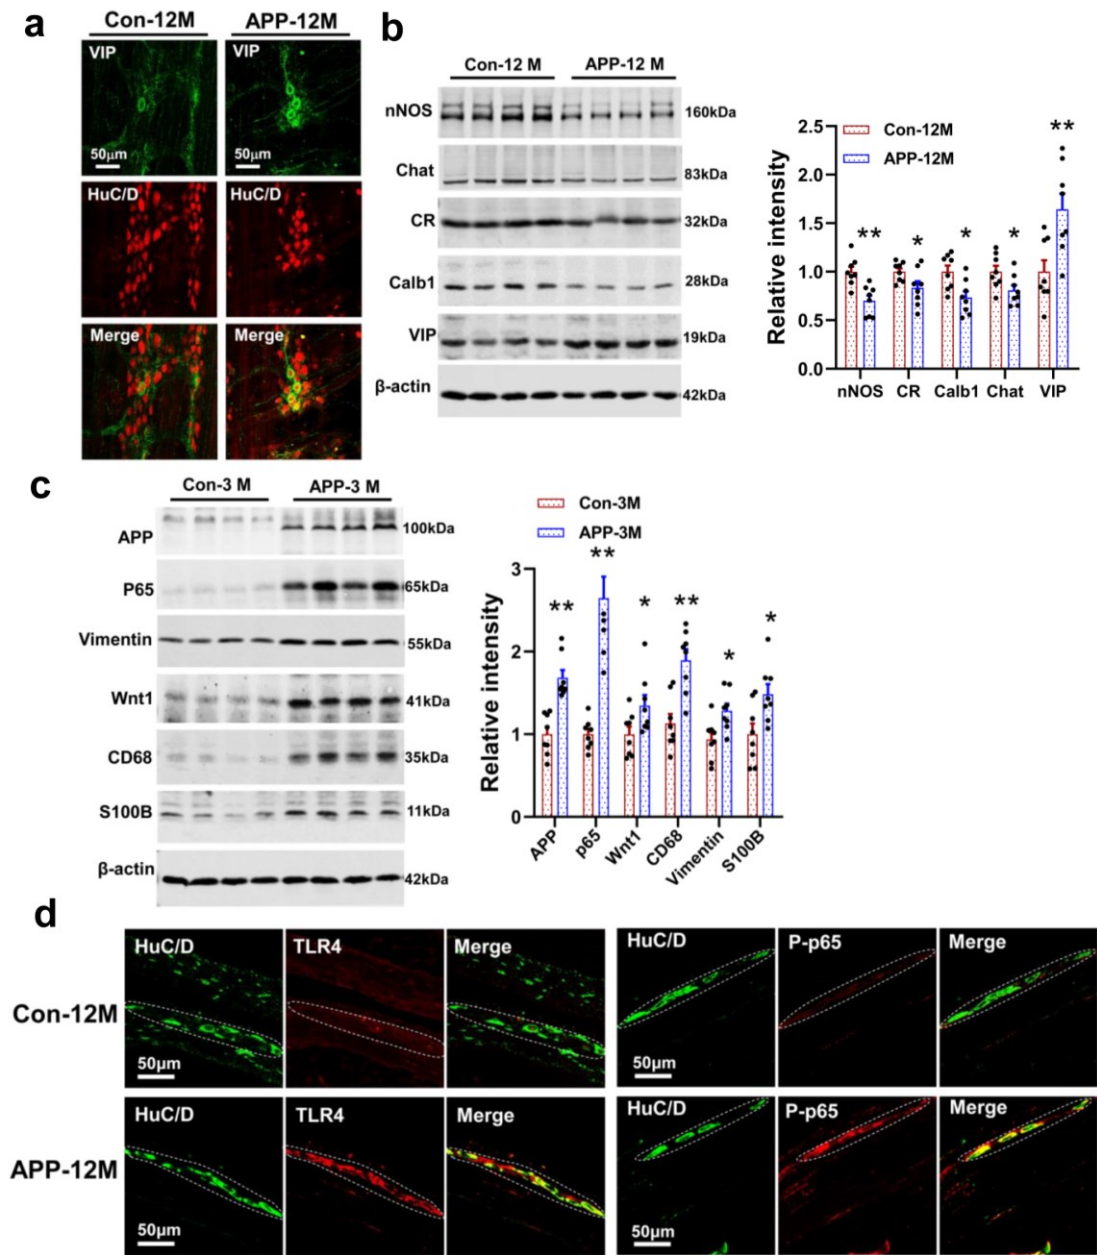

**Fig.S6 Changes of neuron- and inflammation-related proteins in the APP/PS1**

## mice

(a) Representative micrographs of colonic whole mount staining for VIP in the 12-month-old APP/PS1 mice and littermate controls. N=5/group. (b) Western blot analyses the expression of nNOS, CR, VIP, Calb1 and Chat proteins in the colonic LMMP strips of the 12-month-old APP/PS1 mice and littermate controls. N=8/group. Data are presented as mean  $\pm$  SEM, unpaired *t* test, \**P*<0.05. (c) Western blot analysis of the expression of inflammation-associated proteins in the colonic LMMP strips of 3-month-old APP/PS1 mice and their littermate controls. N=8/group. Data are presented as mean  $\pm$  SEM, unpaired *t* test, \**P*<0.05, \*\**P*<0.01. (d) Representative micrographs show the immunoreactivity of TLR4 and phosphorylated p65 (p-P65) in the myenteric HuC/D<sup>+</sup> neurons of APP/PS1 mice and the control group. N=5/group.

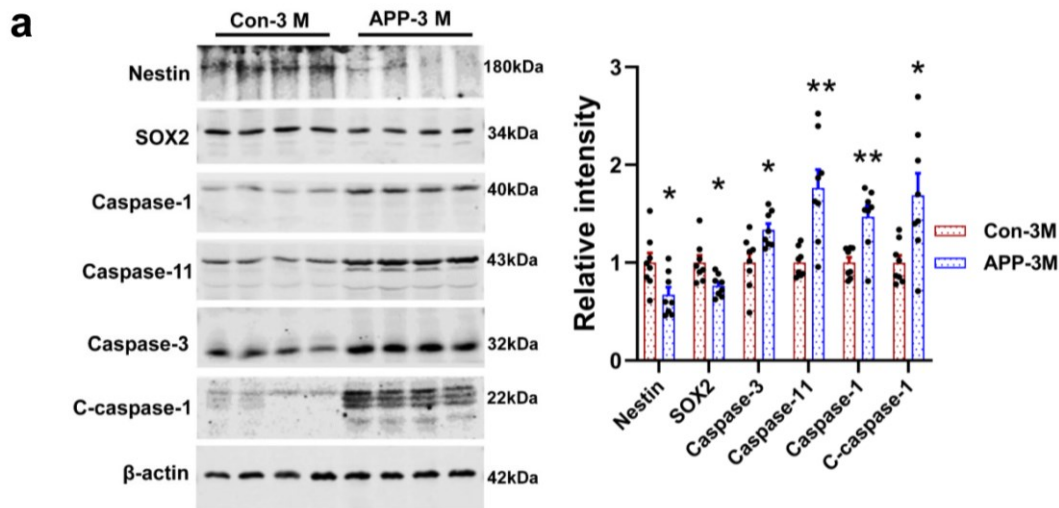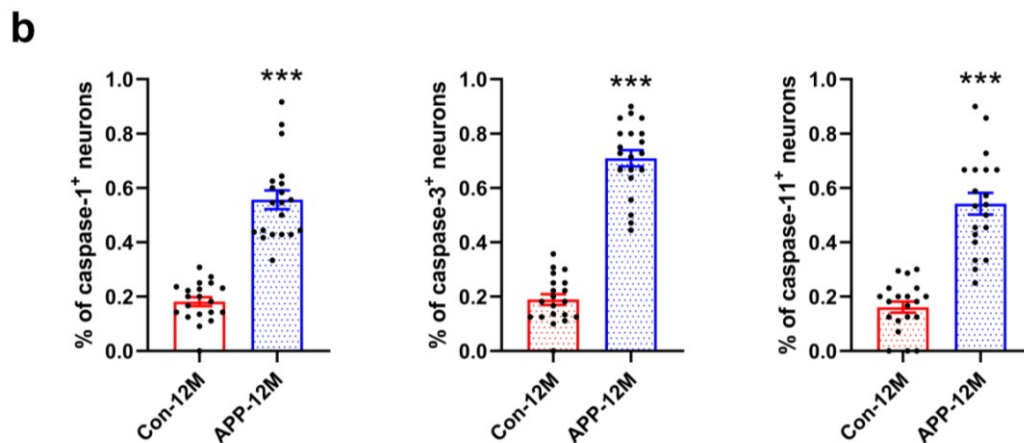



**Fig.S7 Increased apoptosis and pyroptosis and impaired neurogenesis in the enteric neurons of APP/PS1 mice**

(a) Western blot analysis shows that the expression of proteins involved in neurogenesis (SOX2 and Nestin), apoptosis (Caspase-3), and pyroptosis (Caspase-1 and Caspase-11) in the colonic LMMP strips of APP/PS1 mice and the littermate controls. Data are presented as mean  $\pm$  SEM, \* $P$ <0.05, \*\* $P$ <0.01,  $N$ =8/group. (b) Quantitative analysis of the relative proportion of Caspase-1, Caspase-3, and Caspase-11-positive neurons in colonic sections from 12-month-old APP/PS1 mice and the littermate controls. Four fields per preparation,  $N$ =5/group. Data are presented as mean  $\pm$  SEM, unpaired  $t$  test, \*\*\* $P$ <0.001.

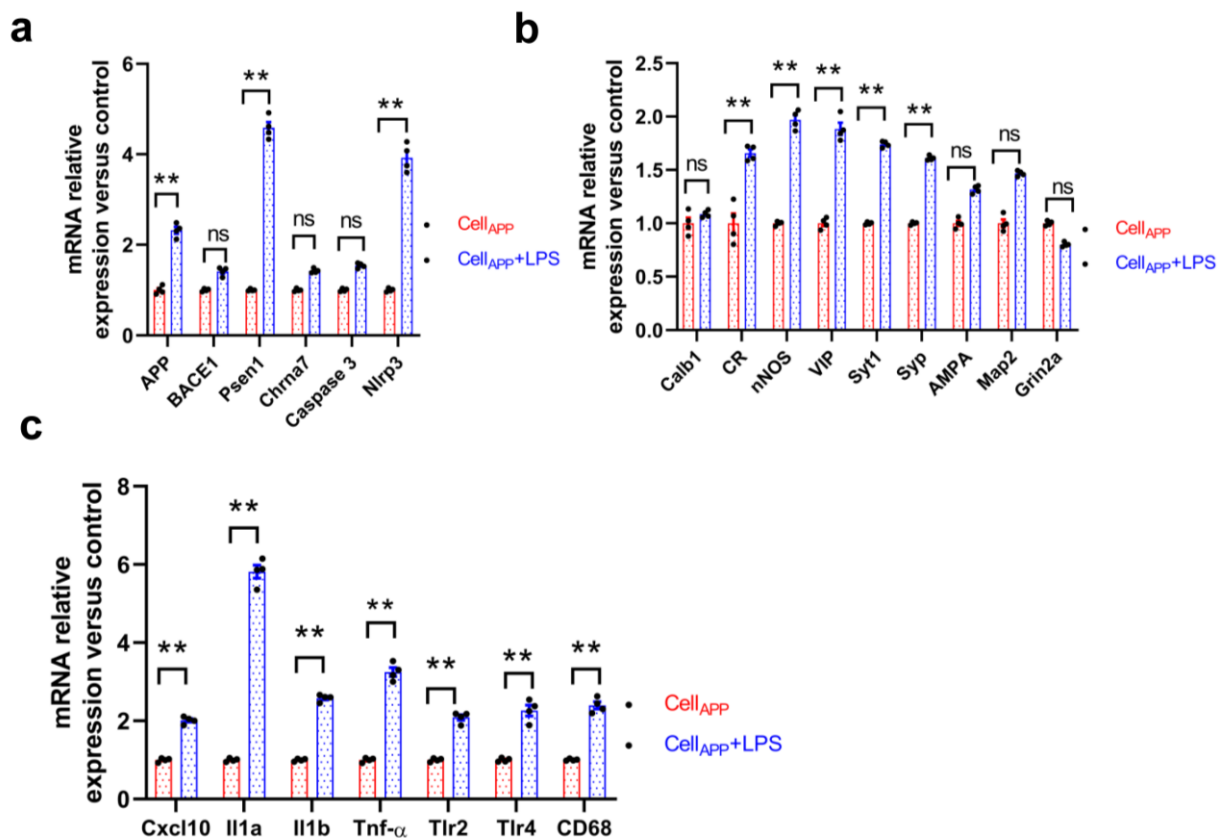

**Fig.S8 Effects of LPS on the gene expression of cultured myenteric neurons from APP/PS1 mice**

(a-c) Analysis of the effects of LPS treatment on the gene expression of cultured myenteric neurons from APP/PS1 mice by qRT-PCR. The longitudinal

muscle-myenteric plexuses from 3-month-old APP/PS1 mice were prepared and digested, cells were treated with 10 ng/ml lipopolysaccharide (LPS) for 72 h. After that, treatment cells were collected for real-time RT-PCR. Data are presented as mean  $\pm$  SEM. Statistical significance was determined using unpaired *t* test,  $**P < 0.01$ . The “ns” represents no significance.

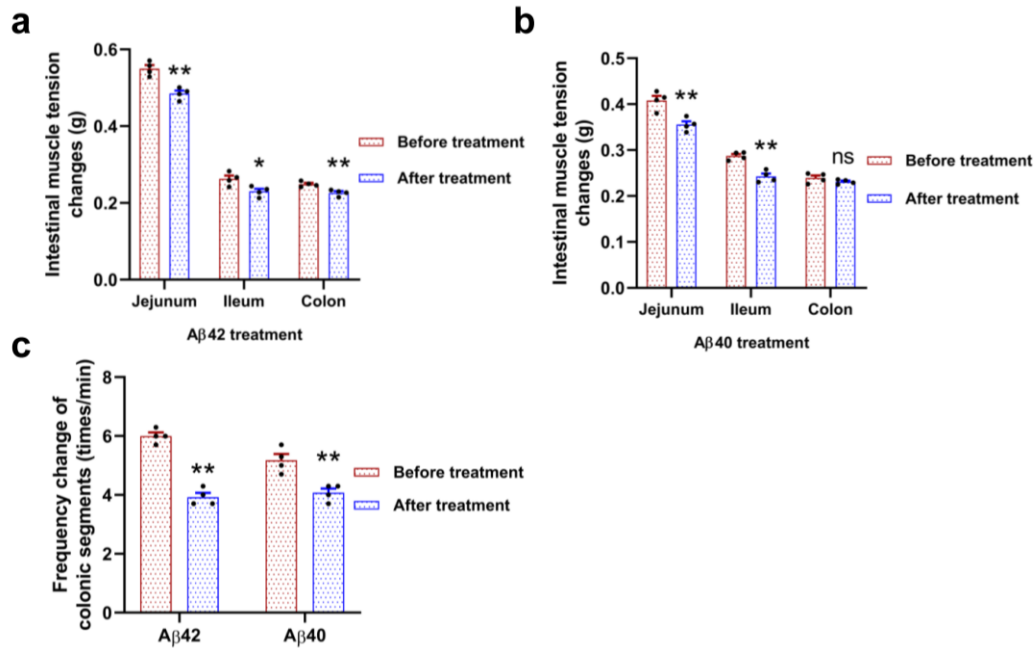

**Fig.S9 Quantification of the effect of A $\beta$  treatments on the spontaneous intestinal contraction**

(a-b) Changes of intestinal muscle tension induced by A $\beta$ 42 treatments (a) and A $\beta$ 40 treatments (b). The 1.5-cm intestinal segments were removed from the 3-month-old WT mice, and changes in muscle tension 5-10 min before and after exposure to each drug were measured. N=4/group. Data are presented as mean  $\pm$  SEM. Statistical significance was determined using unpaired *t* test,  $*P < 0.05$ ,  $**P < 0.01$ . The “ns” represents no significance. (c) The frequency changes of colonic segments induced by A $\beta$ 40 and A $\beta$ 42 treatments. The 1.5-cm intestinal segments were removed from the 3-month-old WT mice, and changes in muscle tension 5-10 min before and after exposure to each drug were measured. N=4/group. Data are presented as mean  $\pm$  SEM. Statistical significance was determined using unpaired *t* test,  $**P < 0.01$ .

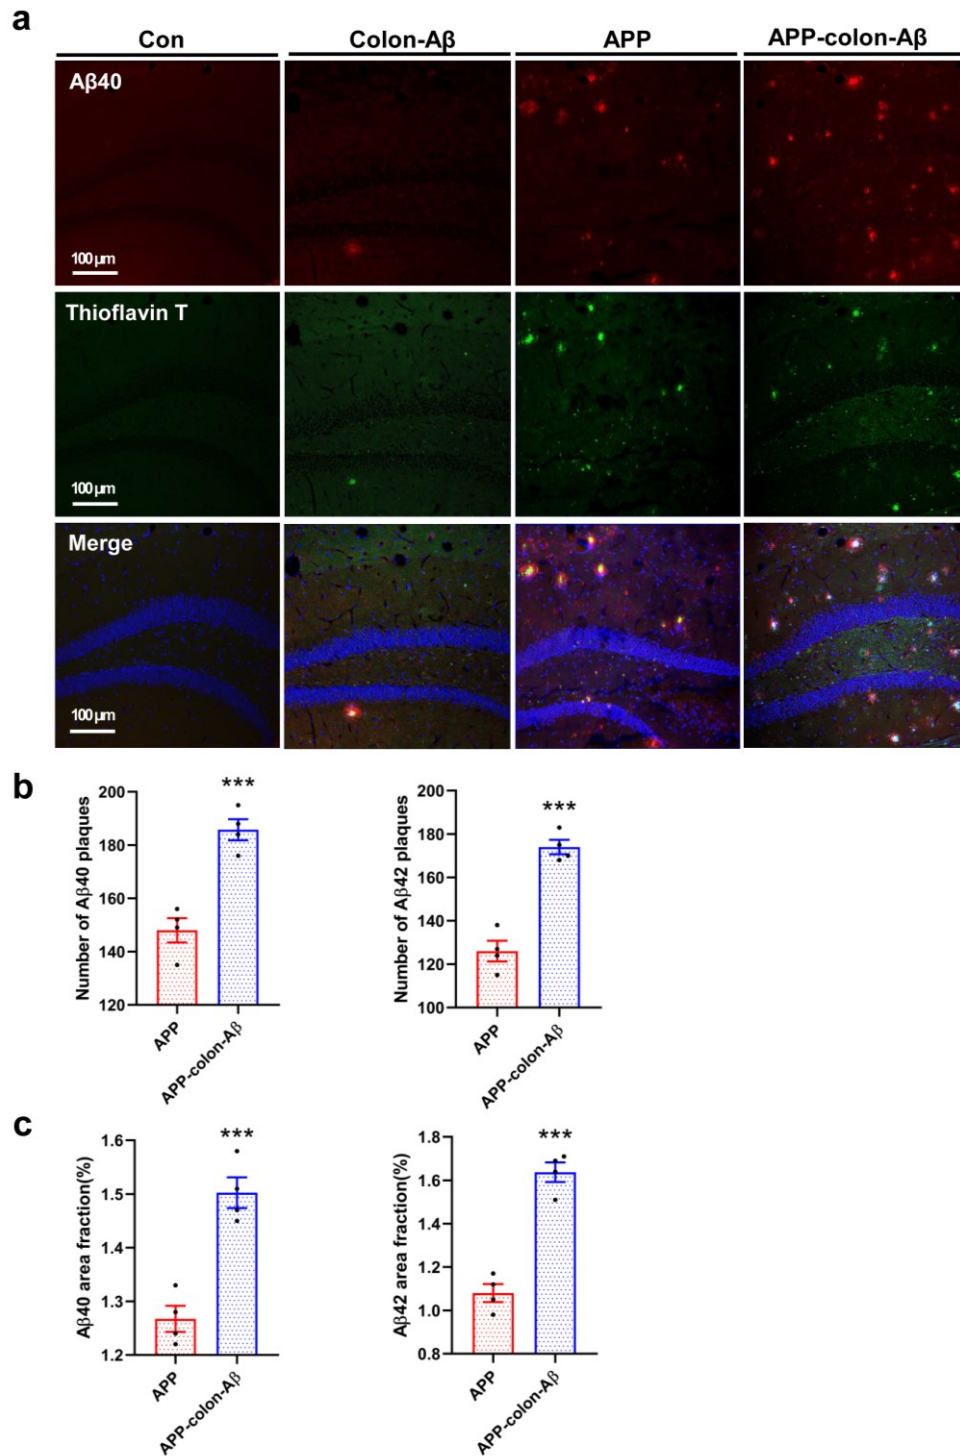

**Fig.S10 The A $\beta$  plaques in the hippocampus of A $\beta$ -injected mice and control group**

(a) Representative micrographs show the typical A $\beta$ 40 plaques in the hippocampus of 12-month-old A $\beta$ -injected WT mice and A $\beta$ -injected APP/PS1 mice. The 3-month-old mice were injected with A $\beta$ 42 oligomers in the proximal colon. Nine months later,

these 12-month-old mice subject to a series of tests. The nucleuses were stained with DAPI; the amyloid- $\beta$  plaque was stained with anti-A $\beta$ 40 antibody (Biolegend:805409) and Thioflavin T. N=4/group. **(b)** Quantitative analysis of the number of A $\beta$ 40 and A $\beta$ 42 plaques in the hippocampus of the A $\beta$ -injected APP/PS1 mice. Data are presented as mean  $\pm$  SEM, unpaired *t* test, \*\*\**P*<0.001. N=4/group. **(c)** Quantitative analysis of the area fraction of A $\beta$ 40 and A $\beta$ 42 plaques in the hippocampus of the A $\beta$ -injected APP/PS1 mice. Data are presented as mean  $\pm$  SEM, unpaired *t* test, \*\*\**P*<0.001. N=4/group.

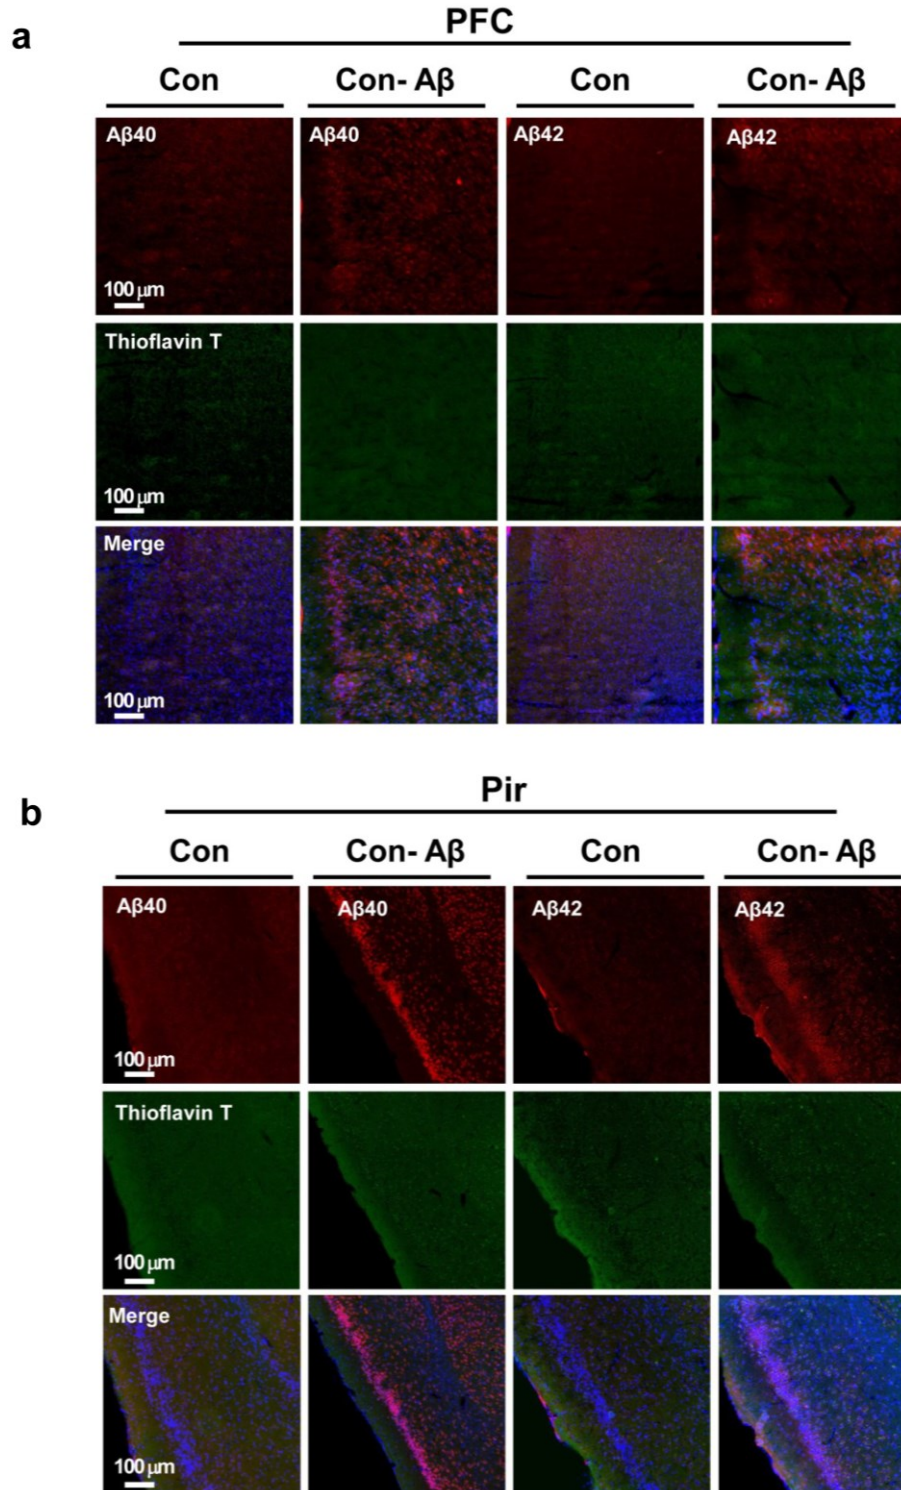

**Fig.S11 The immunoreactivity of A $\beta$ 40 and A $\beta$ 42 in the PFC and Pir of the A $\beta$ -injected mice and control group**

(a) Representative micrographs show the intracellular A $\beta$ 40 (Biolegend:805409) and A $\beta$ 42 (Biolegend:805501) deposition in the prefrontal cortex (PFC) of the A $\beta$ -injected mice and the control group. N=4/group. (b) Representative micrographs show the

intracellular A $\beta$ 40 (Biolegend:805409) and A $\beta$ 42 (Biolegend:805501) deposition in the piriform cortex (Pir) of the A $\beta$ -injected mice and the control group. N=4/group. The nucleuses were stained with DAPI; the intraneuronal A $\beta$  immunoreactivity was stained with anti-A $\beta$ 42 antibody and anti-A $\beta$ 40 antibody.

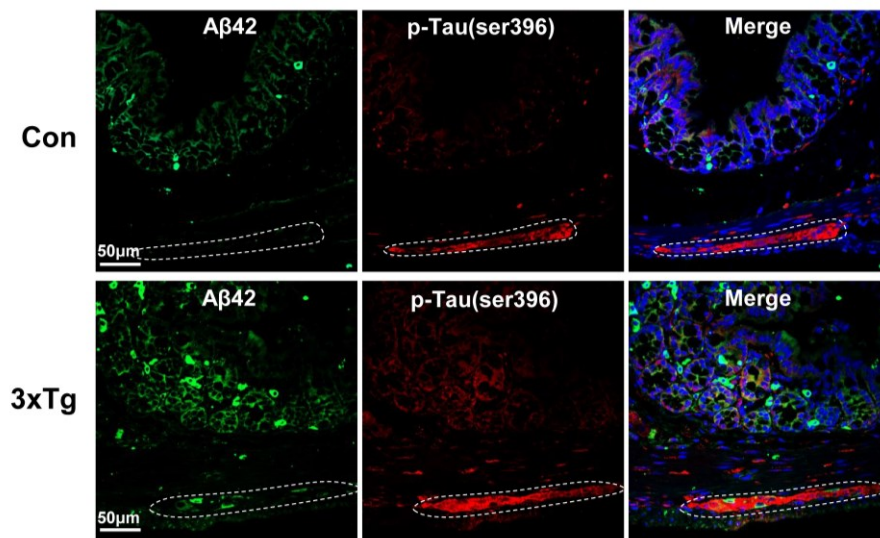

**Fig.S12 The immunoreactivity of A $\beta$ 42 and phosphorylated tau in the colon of 3xTg mice**

Representative micrographs showed the immunoreactivity of A $\beta$ 42 and phosphorylated tau (p-Tau) in the colonic myenteric plexus of 3-month-old 3xTg mice and littermate controls. N=4/group. The nucleuses were stained with DAPI; the A $\beta$  immunoreactivity was stained with anti-A $\beta$ 42 antibody (Biolegend:805501); the phosphorylated tau immunoreactivity was stained with anti-phosphorylated Tau (ser396) polyclonal antibody.

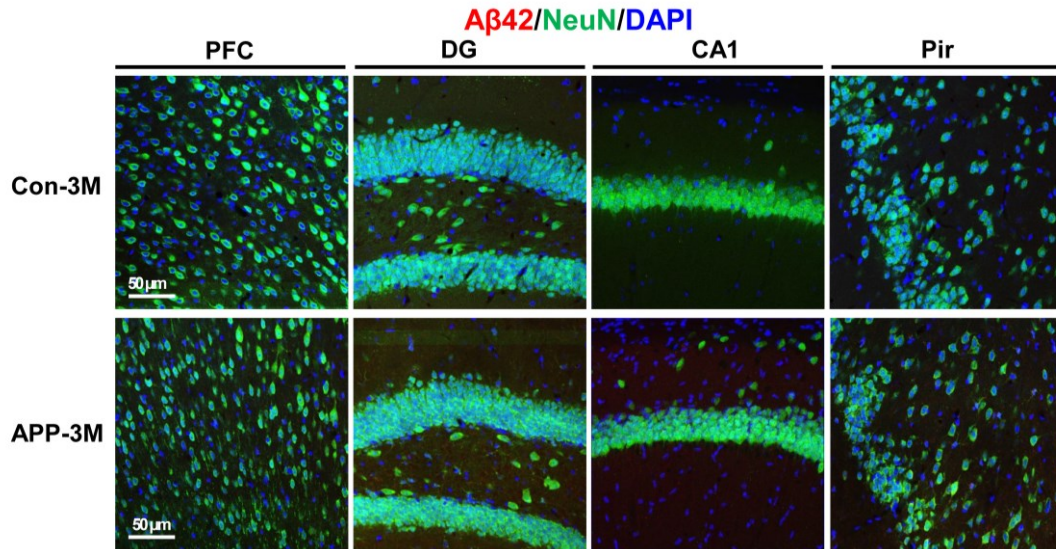

**Fig.S13 The immunoreactivity of A $\beta$ 42 in the brain of 3-month-old APP/PS1 mice**

Representative micrographs showed the immunoreactivity of A $\beta$ 42 and NeuN in the brain of 3-month-old APP/PS1 mice and the littermate controls. N=4/group. The nuclei were stained with DAPI; the A $\beta$  immunoreactivity was stained with anti-A $\beta$ 42 antibody (Biolegend:805501); the neurons in the brain were stained with anti-NeuN antibody. Prefrontal cortex: PFC. Dentate gyrus: DG. Piriform cortex: Pir.

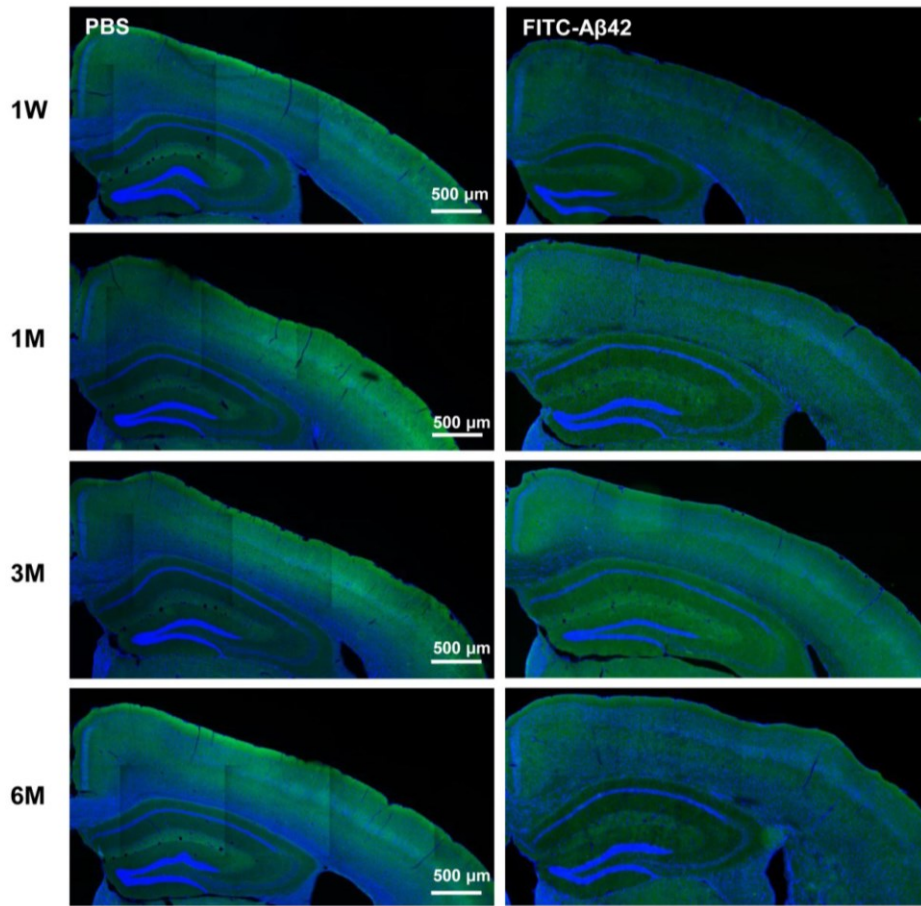

**Fig.S14 No FITC fluorescence was observed in the brain of WT mice injected with FITC-A $\beta$ 42**

Representative micrographs showed the fluorescence of FITC in the brain of wild-type (WT) mice that were injected with the FITC-labeled A $\beta$ 42 in the colon. The injections conducted using a pulled glass pipette into the wall (a depth of 1-2 mm) of the of proximal colon at 3 sites. A total of 5  $\mu$ g of FITC-A $\beta$ 42 at each site was injected, the fluorescence of FITC in the brain was observed at different time points after injection. The nucleus was stained blue by DAPI. N=6/group. 1w: 1-week-old; 1M: 1-month-old; 3M: 3-month-old; 6M: 6-month-old.



| <b>Table S1: The antibody used in this study</b>       |                                 |                       |
|--------------------------------------------------------|---------------------------------|-----------------------|
| <b>Antibody</b>                                        | <b>Supplier</b>                 | <b>Dilution ratio</b> |
| Mouse monoclonal antibody anti-HuC/D                   | Invitrogen:A21271               | IF 1:200              |
| Rabbit polyclonal antibody anti- $\beta$ -amyloid 1-42 | Abcam:ab10148                   | IF 1:200              |
| Mouse monoclonal antibody anti-CD68                    | Abcam:ab31630                   | IF 1:200; WB 1:500    |
| Mouse monoclonal antibody anti- $\beta$ -amyloid 1-40  | Biologend:805409                | IF 1:200              |
| Mouse monoclonal antibody anti- $\beta$ -amyloid 1-42  | Biologend:805501                | IF 1:200              |
| Rabbit polyclonal antibody anti-PSEN1                  | Proteintech:16163-1-AP          | IF 1:200; WB 1:800    |
| Rabbit polyclonal antibody anti-BACE1                  | Proteintech:12807-1-AP          | IF 1:200; WB 1:500    |
| Rabbit polyclonal antibody anti-Calbindin 1            | Proteintech:14479-1-AP          | IF 1:200; WB 1:500    |
| Rabbit polyclonal antibody anti-nNOS                   | Invitrogen:61-7000              | IF 1:200; WB 1:500    |
| Rabbit polyclonal antibody anti-VIP                    | Servicebio:GB11279              | IF 1:200; WB 1:500    |
| Rabbit polyclonal antibody anti-Calretinin (CR)        | Swant:7697                      | IF 1:200; WB 1:800    |
| Rabbit polyclonal antibody anti-TLR4                   | Bioss:bs-1021R                  | IF 1:150; WB 1:500    |
| Rabbit polyclonal antibody anti-p65 (phospho S536)     | Servicebio:GB11142-1            | IF 1:100              |
| Rabbit polyclonal antibody anti-SOX2                   | Proteintech:11064-1-AP          | IF 1:200; WB 1:800    |
| Rabbit polyclonal antibody anti-Nestin                 | Proteintech:19483-1-AP          | IF 1:200; WB 1:500    |
| Mouse monoclonal antibody anti-NF- $\kappa$ B (p65)    | ABclonal:A10609                 | IF 1:200; WB 1:800    |
| Rabbit polyclonal antibody anti-Wnt1                   | Bioss:bs-1739R                  | WB 1:500              |
| Rabbit polyclonal antibody anti-Vimentin               | Bioss:bs-0756R                  | WB 1:500              |
| Rabbit polyclonal antibody anti-S100B                  | ABclonal:A0676                  | WB 1:500              |
| Rabbit monoclonal antibody anti-Caspase 3              | Proteintech:19677-1-AP          | IF 1:150; WB 1:800    |
| Rabbit monoclonal antibody anti-Cleaved caspase 1      | Cell Signaling Technology:89332 | WB 1:500              |
| Rabbit monoclonal antibody anti-Caspase 1              | ABclonal:A18646                 | IF 1:100; WB 1:500    |
| Rat monoclonal antibody anti-Caspase-11 (17D9)         | Cell Signaling Technology:14340 | IF 1:150; WB 1:500    |
| Mouse monoclonal antibody anti-APP                     | Proteintech:60342-1-Ig          | IF 1:150; WB : 1:500  |
| Goat polyclonal antibody anti-Chat                     | Merck Millipore:AB144P          | IF 1:100; WB 1:500    |
| Rabbit polyclonal antibody anti-NLRP6                  | ABclonal:A15628                 | WB 1:500              |
| Rabbit polyclonal antibody anti-phospho-Tau (Ser396)   | Thermofisher: 44-752G           | IF 1:200; WB 1:800    |
| Rabbit polyclonal antibody anti-nNOS                   | Servicebio:GB11145              | WB 1:800              |
| Mouse monoclonal antibody anti- $\beta$ -actin         | Proteintech:66009-1-Ig          | WB 1:20000            |

**Table S2: The primer used by real-time RT-PCR in this study**

| Gene             | Primer sequence           |
|------------------|---------------------------|
| Actb-F           | CCACTGTCGAGTCGCGTCC       |
| Actb-R           | ATTCCCACCATCACACCCTGG     |
| APP-F            | TGCTCTGAACAAGCCGAGAC      |
| APP-R            | AAACTTTGGGTTGACACGCTG     |
| BACE1-F          | GGACTGCAAGGAGACGGAGAA     |
| BACE1-R          | AACAGTCGTCTTGGGACGTG      |
| Psen1-F          | GCCATACTGATCGGCCTGT       |
| Psen1-R          | GCTGCACAAGGTAATCCGTG      |
| Chrna7-F         | CCGTGCCCTTGATAGACA        |
| Chrna7-R         | GGCATTTTGCCACCATCAGG      |
| Caspase 3-F      | GCTTGGAACGGTACGCTAA       |
| Caspase 3-R      | TCCGTACCAGAGCGAGATGA      |
| Nlrp3-F          | AGGCTGCTATCTGGAGGAACT     |
| Nlrp3-R          | GCAACGGACACTCGTCATCT      |
| Cxcl10-F         | GAAATCATCCCTGCGAGCCT      |
| Cxcl10-R         | AGGAGCCCTTTTAGACCTTTTT    |
| IL-1 $\alpha$ -F | CGCTTGAGTCGGCAAAGAAAT     |
| IL-1 $\alpha$ -R | CTTCCCGTTGCTTGACGTTG      |
| IL-1 $\beta$ -F  | TGCCACCTTTTGACAGTGATG     |
| IL-1 $\beta$ -R  | ATGTGCTGCTGCGAGATTTG      |
| Tnf- $\alpha$ -F | AAGAGGCACTCCCCCAAAG       |
| Tnf- $\alpha$ -R | GTGGTTTGTGAGTGTGAGGGT     |
| Tlr2-F           | AAACCTCAGACAAAGCGTCAAAT   |
| Tlr2-R           | GCGTTTGCTGAAGAGGACTG      |
| Tlr4-F           | GTTCTCTCATGGCCTCCACT      |
| Tlr4-R           | TTAGGAACTACCTCTATGCAGGGAT |
| CD68-F           | ACTTCGGGCCATGTTTCTCTT     |
| CD68-R           | GGGGCTGGTAGGTTGATTGT      |
| Cx3cr1-F         | CTTCCCATCTGCTCAGGACC      |
| Cx3cr1-R         | ACCAGACCGAACGTGAAGAC      |
| Calb1-F          | TTCATTTGACGCTGACGGA       |
| Calb1-R          | TCCGGTGATAGCTCCAATCC      |
| CR-F             | TTTGATGCTGACGGAAATGGG     |
| CR-R             | AGCTCCGCCATCTCAATTTT      |
| nNOS-F           | AAGCGACCATTCTCTACGCC      |
| nNOS-R           | CACAGCCGAATTTCTCCCCA      |
| VIP-F            | AAGGAAACAGCCAAGGAGGC      |
| VIP-R            | GTGGTCCAAAGAGAGGCCAG      |
| Syt1-F           | TGCATAAAATCCCATTGCCACC    |
| Syt1-R           | GGGCTGATCCTTCATGGTC       |
| Syp-F            | GGGCAATGATGGACTTCCT       |
| Syp-R            | GCCTGTCTCCTTGAACACGA      |
| Ampa2-F          | GGGGACAAGGCGTGGAATA       |
| Ampa2-R          | GTACCCAATCTTCCGGGGTC      |
| Grin2a-F         | TCTCCGCCTTTCCGATTTGG      |
| Grin2a-R         | GCGTCCAACCTCCCAGTTTT      |
| Map2-F           | TCCCTCTACCTCCGCTTCC       |
| Map2-R           | TCACAGCTTACTCGCAGAGC      |
